# Supplementary material for: Ask1 and Akt act synergistically to promote ROS-dependent regeneration in Drosophila
Source: PubMed Central journal article supplement (PMC6363233; doi:10.1371/journal.pgen.1007926), 2019-01-24
Supplement: pgen.1007926.s008.pdf [file pgen.1007926.s008.pdf]

Computational verification that human Ser83 domain is missing on fly Ask1 gene loci.

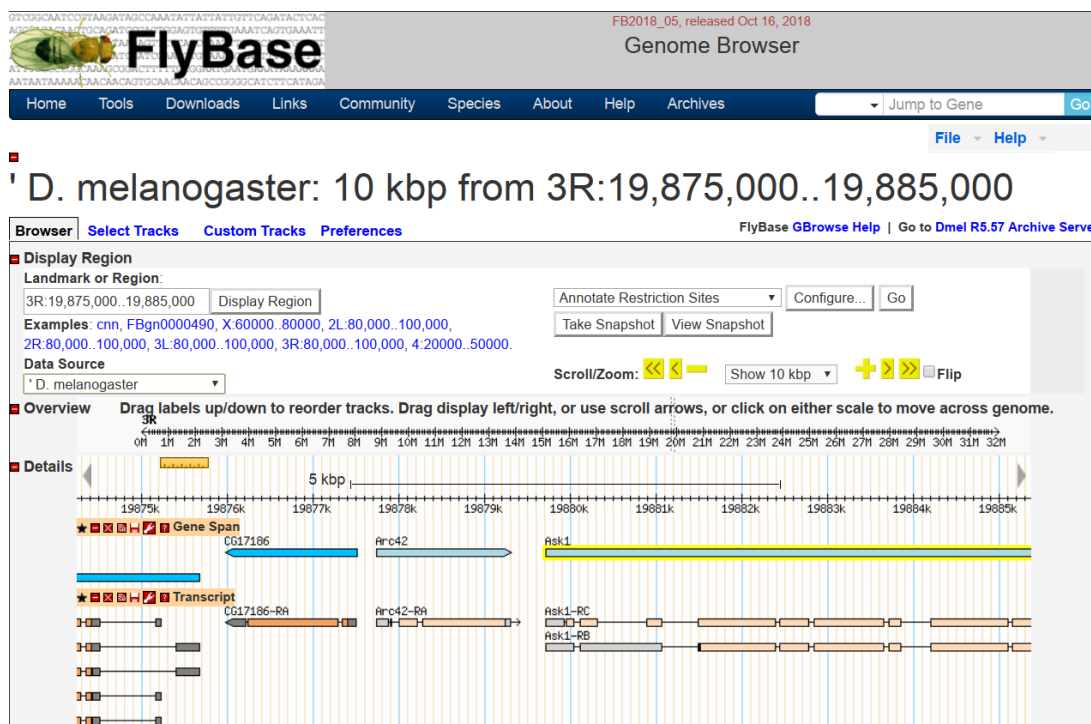

This file contains the plain text genewise alignment of the human M3K5\_HUMAN protein sequence against the genomic segment of 5kbp upstream/downstream that is centered on the annotated *Drosophila melanogaster* Ask1 gene transcription start site (see above figure). The genomic sequence segment was retrieved directly from FlyBase (dm6.chr3R:19,875,000-19,885,000 [+]).

No alignment was reported for the first 126 residues of the human protein where the Ser83 *RxRxx[ST]* domain has been described. The output from genewise mapping is listed below:

genewise output

Score 793.88 bits over entire alignment  
Scores as bits over a synchronous coding model

Warning: The bits scores is not probablistically correct for single seqs  
See WWW help for more info

|                      |      |                                                    |                           |
|----------------------|------|----------------------------------------------------|---------------------------|
| sp Q99683 M3K5_HUMAN | 127  | LETLHFQKLDGETTVLDRFYNADIAVEMSDAFRQPSLFYHLGVRESF    |                           |
|                      |      | L +L F +LDFGET VL+ FYNAD+A++++S +Q L YH GVRESF     |                           |
| dm6_chr3R            | 5102 | tgttctgccgtggaagcgattaggggaagcaacaccccttctggagat   |                           |
|                      |      | tcctatagtatgacattactaacatcttatgttcaagctcaaagtgagt  |                           |
|                      |      | gacggcgcgcccgggtggggtccctgctccgctccggggtctccctggcc |                           |
| sp Q99683 M3K5_HUMAN | 176  | SMANNIILYCDTNSDSLQSLK---EIICQKN                    |                           |
|                      |      | M NI+ Y D +S SLK E++                               |                           |
| dm6_chr3R            | 5249 | gaagaacatagagtacacacagctggtatcgc                   |                           |
|                      |      | gtaaattcaaatacaactgtatgcattcgcg                    |                           |
|                      |      | ggggccccccctcgggctcgggtgagtcggc                    |                           |
| sp Q99683 M3K5_HUMAN | 204  |                                                    | TMCTGNYTFVPYMITPHNKVYC    |
|                      |      |                                                    | C NY F+ Y C               |
|                      |      |                                                    | LSCA-NYLFLSYKRNAETNS-C    |
| dm6_chr3R            | 5342 | GTGCCTG Intron 1                                   | CAGcttg atctcatacaggaat t |
|                      |      | <0-----[5342 : 5883]-0>                            | tgcg aattgaagacacac g     |
|                      |      |                                                    | cgtc ccgtcccgggtggctc c   |

|                      |      |                                                                                                                                                              |
|----------------------|------|--------------------------------------------------------------------------------------------------------------------------------------------------------------|
| sp Q99683 M3K5_HUMAN | 226  | CDSSFMKGLTELMQPNFELLGPICLPLVDRFIQLKVAQASS<br>+S +PN E G + L R+ + L+ + S<br>HLTSQPNSGNNNSKEPNAE---GRV-PTLQWRLKRKLQDVEIQS                                      |
| dm6_chr3R            | 5944 | ccaaccaagaaaagcagg gcg catctccacaccgggact<br>atcgacaggaagaacaca ggt cctaggtagataataatac<br>cgccgccccccgactca aag ctgggcccaggattgcgg                          |
| sp Q99683 M3K5_HUMAN | 269  | QYFRESILNDIRKARNLYT<br>++RE +L+D+R AR+ Y<br>S:K[aaa] AHMREKFLSDMRTARDTYA                                                                                     |
| dm6_chr3R            | 6061 | AAGTGAGTA Intron 2 CAGAgcacgatcagacagcggatg<br><2-----[6063 : 6484]-2> catgaattgatgccgacac<br>ccgtgatgtcagggcgcc                                             |
| sp Q99683 M3K5_HUMAN | 289  | --GKELAAELARIRQRVDNIEVLTADIVINLLLSYRDIQDYDSIVKLVE<br>G +L + L +R+R+D+ VL+ ++V + + S RD+QDYD++V+LV<br>TNGAKLQSILHEMRKRLDDPHVLSGEVVHSFMCSLRDQDYDAMVRLVN        |
| dm6_chr3R            | 6543 | aaggaccaatcgacaccggcggcctggggcatattcaggcgtggagccga<br>cagcatagttaatgagtaacattcgattagttgctgataaaactgtta<br>ccccggtagcggagggtgtcgtcagactcggggtggcctcggagct     |
| sp Q99683 M3K5_HUMAN | 336  | TLEKLP-TFDLASHHHVKFHYAFALNRRNLPDRAKALDIMIPMVQSEG<br>L+ +P T ++ F YAFALNRRN GDR KAL+ + ++ +<br>DLKNIPNTRKYVETGNMSFLYAFALNRRNRKGDREKALESSLKALEKKE              |
| dm6_chr3R            | 6690 | gcaaacacatcgagaaatctgtgcacaacaggcggcgttcagcgaag<br>ataatcacgaatacgaatgacttagtagagagagaactactactaaaa<br>cggcaccggcggggcgtcgccccgcaatagactagtgtggggagggg       |
| sp Q99683 M3K5_HUMAN | 384  | QVADMYCLVGRIYKDMFLDSNFTDTESRDHGASWFKKAFESEPTLQSG<br>DM CL GRIYKD+F+S++TD S H W++++FE +P +G<br>NHFPDMLCLCGRIYKDFVESDYTDATSLAHAIKWYRQSFVQPNEYAG                |
| dm6_chr3R            | 6837 | actcgactctgcatagatggtgtaggaatgcgaatccatggccagtgg<br>aatcattgtgggtaaatttacaacaccgtcactagagagtatacaaacg<br>cctgcgccgcccccgctgaccgcccctggcccggcactggggtgtac     |
| sp Q99683 M3K5_HUMAN | 433  | INYAVLLLAAGHQFESSFELRKVGKLSLLGKKGNLEKLQSYWEVGGFF<br>IN A LL+ G +F ++ EL+ +G+ L++L+GKKG+L L YW+V F<br>INLATLLVIEGKEFTNTEELQHIGMTLNNLIGKKGSLSSLSEYWDVATF       |
| dm6_chr3R            | 6984 | aacgaccgaggagtaaaaggtccagaataatagaagacttcagttgggat<br>tatccttttagaatcacaataatgtctaattgaaggtcctgaagatcct<br>ctgttggtcgcggtctgggggcccgcactactagccacggtgtgtgccc |
| sp Q99683 M3K5_HUMAN | 482  | LGASVLANDHMRVIQASEKLFKLPWYLKSIIVETILYKHFVKLTTE<br>SVLAND+ + IQA+E +FKLK P WYLKS + I + F K E<br>FEISVLANDYAKAIQAAECMFKLPPNWLKSTIGNISLIHRFRKKPEE               |
| dm6_chr3R            | 7131 | tgatgtgagtgagacgggtatacaccattcataagaatcacctcaacgg<br>tatcttcaaacactaccagttataaccagatacctgatcttagtgaacaa<br>tgccctgccccgggtatcgcgcgagaccgtgggcatcttatatagcgca |
| sp Q99683 M3K5_HUMAN | 531  | -QPVAKQELVDFWMDFLVEATKTD--VTVVRFVPL<br>QP ++++ FWMDF +EAT T+ +RFP+L<br>RQPPIEQVFQFWMDFLEATNTEEVKNSIRFPIL                                                     |
| dm6_chr3R            | 7278 | cccaggcgtcttagttcgaaaggaaaactcac<br>gacctaaattatgtattaccacaataagtgctctt<br>cggccggggcggcctggccccggtgcctctgtg                                                 |

|                      |      |                                                                                                                                                         |                                                                                                                                                             |
|----------------------|------|---------------------------------------------------------------------------------------------------------------------------------------------------------|-------------------------------------------------------------------------------------------------------------------------------------------------------------|
| sp Q99683 M3K5_HUMAN | 563  |                                                                                                                                                         | ILEPTKIYQPSYLSINNEVEEK<br>ILEP KIY PSY++IN + +EK<br>ILEPQKIYMPHYVTINMDADEK                                                                                  |
| dm6_chr3R            | 7383 | GTTGGTA Intron 3                                                                                                                                        | CAGacgcccaatacatgaaaagggga<br><0-----[7383 : 7438]-0>ttacaatatcgatctatacaaaa<br>ccgtggttgcttgctacgtgtgg                                                     |
| sp Q99683 M3K5_HUMAN | 585  | TISIWVH-LPDDK---KGIHEWNFSASSVVRGVSISKFEERCCFLYVLHN<br>+I I ++ L K K IH++ F AS ++ VS+ K ++RC +LYV HN<br>SIQIVNICLAHAKNACKKIHDFLVASKIKSVSLYKRDDRCAYLIVVHN |                                                                                                                                                             |
| dm6_chr3R            | 7505 |                                                                                                                                                         | tacagaattgcgaagtaaacgtctgtaaatgactaaggctgtttgcca<br>ctattatgtcacaacgaataatccccatactgtaagaaggcatataaaa<br>ctgtgcctgtcagtgtagaccctcgaggcgccctcggtttccgctcc    |
| sp Q99683 M3K5_HUMAN | 630  | SDDFQIYFCTELHCKKFFEMVNTITEEKGRSTEEDGESDLE<br>SDDFQIYF + +KF++M+ +T ++ + +++ E<br>SDDFQIYFPSTERRQKFYDMILEMTADQVVFVNLNDDANI-E                             |                                                                                                                                                             |
| dm6_chr3R            | 7652 |                                                                                                                                                         | tggtcattctagcccattgaacgaaggcggtgacaaggaa g<br>caatataatcccaggaataatcccaatccccatgaaacat a<br>atataatcctaaaagcctgagggtatgggtctccttcttc g                      |
| sp Q99683 M3K5_HUMAN | 673  |                                                                                                                                                         | YDYEYDENGDRVVLGKGTYGIV<br>Y+Y+YDE ++VLGKGTYG V<br>YEYDYDEQNRKVMVLGKGTYGTV                                                                                   |
| dm6_chr3R            | 7778 | GTAAGTT Intron 4                                                                                                                                        | TAGtgtgtggcacaagcgagatgag<br><0-----[7778 : 7843]-0>aaaaaaaaagatttgagcagct<br>cgccctggtcagggcatttccc                                                        |
| sp Q99683 M3K5_HUMAN | 695  | YAGRDLNQRVRIAIKEIPERDSRYSQPLHEEIALHKLKHKNIQYLGS<br>YA RD QVRIAIKE+PE++S+ QPLHEE I LH L+H+NIV+YLG<br>YAARDKQTQVRIAIKEVPEKNSQDVPQLHEEIKLHSQLRHRNIVRYLGS   |                                                                                                                                                             |
| dm6_chr3R            | 7910 |                                                                                                                                                         | tgagacacgcagaaggcgaatcgcccccgaatcccccaagcttgt<br>accgaaacatgtctaatacaacaataataatacatgagattgatgc<br>cccgcgggggacctgggggagcggtggagcggtgactggatccatctgag       |
| sp Q99683 M3K5_HUMAN | 744  | FSENGFIFMEQVPGGSLALLRSKWGPLKDNEQTIGFYTKQILEGLK<br>SENGF+KIFMEQVPGGSL LL +KWGPLKDNE T+ FY+KQILEGLK<br>CSENGFFKIFMEQVPGGSLDLLETKWGPLKDNSTMAFYSKQILEGLK    |                                                                                                                                                             |
| dm6_chr3R            | 8057 |                                                                                                                                                         | ttgagttaatagcggctctgctgaatgccagagtaagtttacacggca<br>gcaagttatccatccggtcattacaggctaaaacctctacaattagta<br>cggccccgcgggggaagtcccagcagtgccgcccgcggccgggg        |
| sp Q99683 M3K5_HUMAN | 793  | YLHDNQIVHRDIKGDNLINTYSGVLKISDFGTSKRLAGINPCTETFTG<br>YLH+ IVHRDIKGDNL+NTYSGV+KISDFGTSKRLA INP TETFTG<br>YLHEQDIVHRDIKGDNLVNTYSGVVKISDFGTSKRLARINPMTETFTG |                                                                                                                                                             |
| dm6_chr3R            | 8204 |                                                                                                                                                         | tccgcgagccgaaggagcgaatagggaatgtgataccgcaacaagatag<br>ataaaaattagatagaattacaggttatcatgcccagtcgtactactcg<br>ctcggtttttagtccggtcgtccgctccccgggccccggggctgc     |
| sp Q99683 M3K5_HUMAN | 842  | TLQYMAPEIIDKGRGYGKAADIWSLGGCTIEMATGKPPFYELGEPQAA<br>TLQYMAPE+ID+G RGYG AADIWS GCT +EMATGKPPF ELG AA<br>TLQYMAPEVIDQGVRYGPAADIWSFGCTNEMATGKPPFIELGSAHAA  |                                                                                                                                                             |
| dm6_chr3R            | 8351 |                                                                                                                                                         | atctagcgggagcggctgcccgggttggtaaggagacactagcggcgg<br>ctaatacattaagtggagcccatgctggcatatccgacctatggcacc<br>cggcgggggtcgaaacctcggtccgctacactggtgcaagtccggtcctgc |
| sp Q99683 M3K5_HUMAN | 891  | MFKVG+K HP IPE +SA AK FIL+CF R A+ LL D FL+<br>MFKVGfykhhpnipeelsanankfilrcfaisvmdrpsasqllepdflq                                                         |                                                                                                                                                             |
| dm6_chr3R            | 8498 |                                                                                                                                                         | ataggtaaccaacggctgagaatatctgaagagcctgtcccggctcc<br>ttatgtaaaacatcaatccacaatttggctgttagccccataactta<br>cggctcgggtcacgggcccagcttctccccggcaccgatgaccaa         |

```

sp|Q99683|M3K5_HUMAN 940          SSKKKKTQPKLSALSAGSN
                                K +K +P L
                                V:D[gat]          --KPRKVRPALPI----NT
dm6_chr3R          8645 GAGTGAGTT Intron 5          AAGT accagccgcca aa
                                <2-----[8647 : 8709]-2> acgatgcctct ac
                                accggcacgcc tt

sp|Q99683|M3K5_HUMAN 960 EYLRISISLPVPVLVEDTSSSSEYGSV--SPDTELK
                                E+ RSIS+P V T+ Y + P T
                                EFGRSISVPADRFVHKTTTPPLSYNTTCNTPTPEL
dm6_chr3R          8750 gtgcaatgcggtgcaaacccataaataacaacgt
                                atgggtctccagttaaccctgaaccgaccccat
                                gcacctgggttggtgcacagggccacctgcaggag

sp|Q99683|M3K5_HUMAN 993          DPFSEKTRAKSCGERDVKG
                                + F ++ R S G
                                V:D[gac]          NQFMLERR-NSHG-----
dm6_chr3R          8855 GAGTAAGTT Intron 6          CAGCactacgcc atcg
                                <2-----[8857 : 9238]-2> aatttagg acag
                                cgtgtaga tcta

sp|Q99683|M3K5_HUMAN 1013 IRTLFLGIPDENFEDHSAPPSPEE--KDSGFFMLRKDSERRATLHRILT
                                FL P+ S S E GF+ L+KDS+RR TL ++L
                                ----FLLSPEIEPSTPSLRTSISETSETDGFYRLKKDSQRRTTLSKVLA
dm6_chr3R          9276 ttctcgagctacttcaaaagaagaggttacaagtcaaacctagcg
                                ttccataccccctgctgacgacagtagtaaacagcctcattc
                                tgcgagtatcggcgtgcttggcgtcttcgtagtggggagtcggga

sp|Q99683|M3K5_HUMAN 1060 EDQDKIVRNLMESLAQGAEEPCLKWEHITTLIASLREFVVRSTDRKIIAT
                                D+ KI ++ + ++ + LI LR+++ + + K +
                                LDESKICDIWLKKVDADQNSIAIRKSDLEVLIRGLRDIYIMNENEKHLA
dm6_chr3R          9411 cggtaatgatcaaggggcatagaaaagtgccacgcgtaagagactgg
                                taacatgatgtaatacaaacctcgagatatttggtgaattaaaaaac
                                acacgccttggggccttgcgtgtgactggtacaaggcctgcacagtgg

sp|Q99683|M3K5_HUMAN 1109 TLSKLELDFDSHGISQVQVVLFGFQDAVNKVLRNHNKPHWMFALDS
                                T+++LK +L+ D+ + + + L+ FQDAV VLR H IKPHWMFALD+
                                TINELKQKLNNDAVALDHLHLALYSFQDAVVCVLRHYCIKPHWMFALDN
dm6_chr3R          9558 aaagcacacaagggcgccctgctttcggggtgcctctaacctatgtga
                                ctaataaataaacctctaataatctactaacctgttgaagtacagttctaa
                                tccagaaggccattgctttgggctgcccaggctccactggcagtt

sp|Q99683|M3K5_HUMAN 1158 IIRKAVQTAITILVPEL
                                ++++AVQ A+TI PEL
                                LVKRAVQAAVTIFSPEL
dm6_chr3R          9705 cgacggcgggaattcgc
                                ttagctacctcttccat
                                gtggccgggcttcttag

```

//
